# Supplementary material
Source: publisher site journal article supplement (https://www.dovepress.com/get_supplementary_file.php?f=482849.docx)
Supplement: Supplementary file 1 [file get_supplementary_file.php]

**Supplemental tables**

**Table S1.** Clinical characteristics of the MRONJ patients

| **No.** | **Age** | **Gender** | **Disease** | **Bisphosphonate** | **Dose (mg)** | **Duration** | **Group** |
| --- | --- | --- | --- | --- | --- | --- | --- |
| **Patient 1** | 22 | Female | Maxillary retrusion,  Mandibular protrusion | No | 0 | 0 | Healthy |
| **Patient 2** | 27 | Female | Maxillary protrusion,  Mandibular retrusion | No | 0 | 0 | Healthy |
| **Patient 3** | 32 | Female | Mandibular protrusion | No | 0 | 0 | Healthy |
| **Patient 4** | 20 | Male | Mandibular protrusion | No | 0 | 0 | Healthy |
| **Patient 5** | 28 | Male | Maxillary retrusion,  Mandibular protrusion | No | 0 | 0 | Healthy |
| **Patient 6** | 61 | Female | Breast cancer | Zoledronic acid | 4 (/month) | 30 months | MRONJ |
| **Patient 7** | 58 | Female | Breast cancer | Zoledronic acid | 4 (/month) | 28 months | MRONJ |
| **Patient 8** | 54 | Male | Multiple myeloma | Zoledronic acid | 4 (/month) | 32 months | MRONJ |
| **Patient 9** | 69 | Male | Prostatic cancer | Zoledronic acid | 4 (/1-3months) | 36 months | MRONJ |
| **Patient 10** | 56 | Male | Lung cancer | Zoledronic acid | 4 (/month) | 24 months | MRONJ |

# Supplementary methods

***Adipogenic differentiation and Oil Red O staining***

ADSCs were cultured in 6-well plates with a complete medium. After cells reached ~100% confluency, the complete medium was replaced with an adipogenic differentiation medium according to the manufacturer's instructions (HUXMD-90031, Cyagen Biosciences, USA). Two weeks later, the cells were washed with PBS, fixed with 4% PFA for 30 min, and stained with Oil Red O staining solution at RT for 30 min. Cells were then washed again and visualized with an Olympus microscope.

***Osteogenic differentiation and Alizarin red S staining***

ADSCs were cultured in 6-well plates with a complete medium. After cells reached ~70% confluency, the complete medium was replaced with an osteogenic differentiation medium according to the manufacturer's instructions (HUXMD-90021, Cyagen Biosciences, USA). Three weeks later, the cells were washed with PBS, fixed with 4% PFA for 30 min, and stained with Alizarin red S staining solution at RT for 30 min. Cells were then washed and visualized with an Olympus microscope.

***Flow cytometry***

ADSCs (passage 3) were collected, washed three times with PBS, and then incubated with PE anti-human CD44 (338808, Biolegend, San Diego, CA, USA), APC/Cyanine7 anti-human CD73 (344021, Biolegend, San Diego, CA, USA), Brilliant Violet 421™ anti-human CD90 (328122, Biolegend, San Diego, CA, USA), APC anti-human CD105 (323208, Biolegend, San Diego, CA, USA), APC anti-human CD34 (343510, Biolegend, San Diego, CA, USA), Alexa Fluor® 488 anti-human CD19 (302219, Biolegend, San Diego, CA, USA), APC/Cyanine7 anti-human CD45 (304014, Biolegend, San Diego, CA, USA), Alexa Fluor® 488 anti-human HLA-DR (307619, Biolegend, San Diego, CA, USA), and APC anti-human CD11b (301310, Biolegend, San Diego, CA, USA) antibodies for 30 min antibodies at 4 °C for 30 min in the dark, following the manufacturer's instructions. Then, ADSCs were washed twice with PBS, suspended in 300 μL PBS with 1% FBS and identified by flow cytometry.

***Exosomes uptake assay***

Exosomes were labeled with the red fluorescent cell linker PKH-26 (MINI26, Sigma-Aldrich, St. Louis, MO, USA), diluted in 1 mL Diluent C and 4 µL PKH26 dye diluted in 1 mL Diluent C for 4 min after which 2 mL 0.5% bovine serum albumin (BSA) was used to bind excess dye. Exosomes were washed with PBS and centrifuged at 100,000× g for 1 h. Next, exosomes (100 µg/mL) were incubated with BMDMs for 6 h, 12 h, and 24 h. After each time point, samples were washed three times with PBS, fixed in 4% PFA for 15 min, and stained with DAPI. BMDMs were visualized with a confocal microscope (TCS-SP8, Leica, Wetzlar, Germany).

***Preparation of hydrogel-exosome complex***

The hydrogel was mixed with PKH26-labeled exosomes according to the manufacturer’s protocol (EFL-GM-30, Engineering For Life, China) and was then assessed using a confocal microscope (TCS-SP8, Leica, Germany). The BCA assay was conducted to detect the release rate of exosomes from the hydrogel.

***Cell Viability***

The cell counting kit-8 (CCK8) assay (Dojindo, Kumamoto, Japan) was used to examine the effect of Zol on BMDMs. BMDMs were cultured in 96-well cell culture plates (2 × 103 cells/ 200 µL/well) and incubated overnight. Then, the cells were exposed to increasing concentrations of Zol (0, 1, 5, 10, 25, and 50 µM) for 24 h or 48 h. After each time point, 10 µL of sterile CCK-8 solution was added to each well and incubated at 37 °C for 2 h in the dark. The absorbance was detected at 450 nm absorbance with a microplate reader (ELX808, Bio Tek, Winooski, VT, USA).

# Supplementary Figures

**
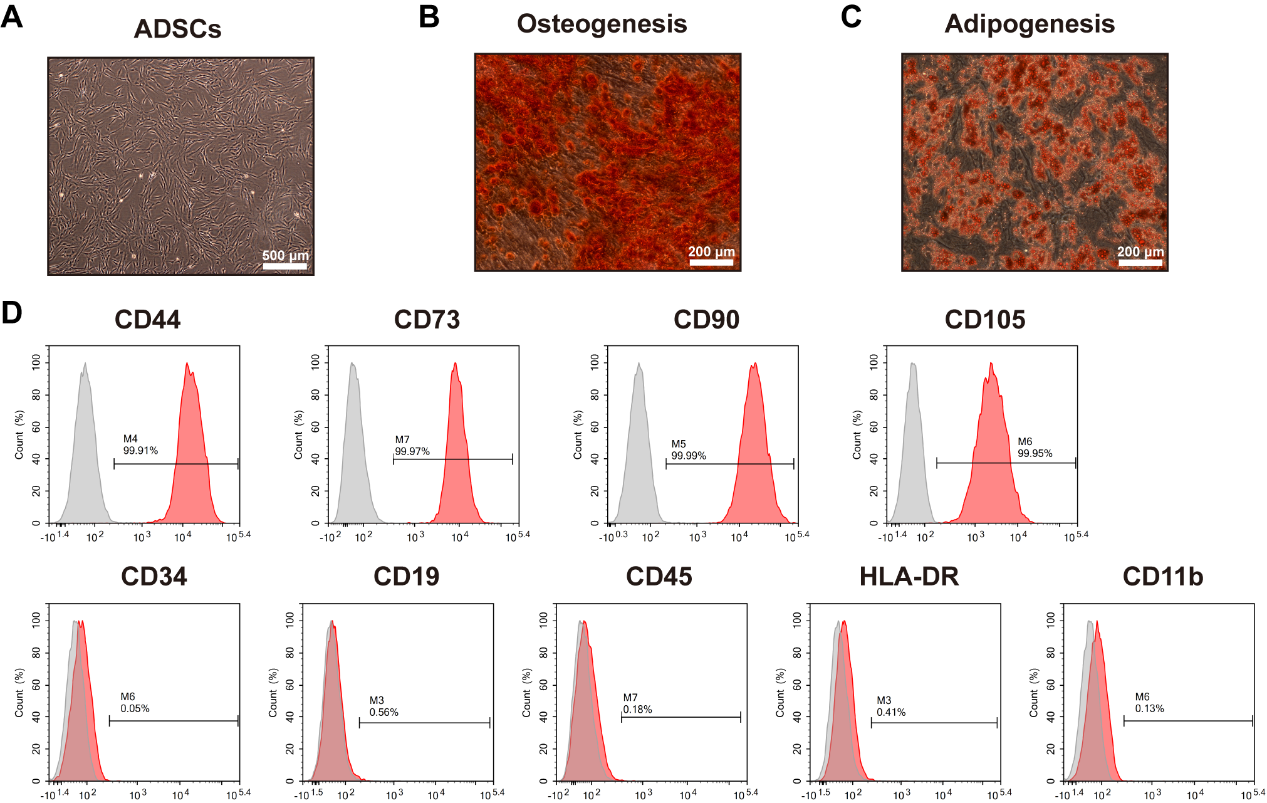
**

**Figure S1. Identification of ADSCs. (A)** Morphological features of ADSCs under a microscope. Scale bar = 500 μm. **(B)** Alizarin red S staining of ADSCs (3 weeks). Scale bar = 200 μm. **(C)** Oil red O staining of ADSCs (2 weeks). Scale bar = 200 μm. **(D)** Flow cytometry analysis of ADSCs.


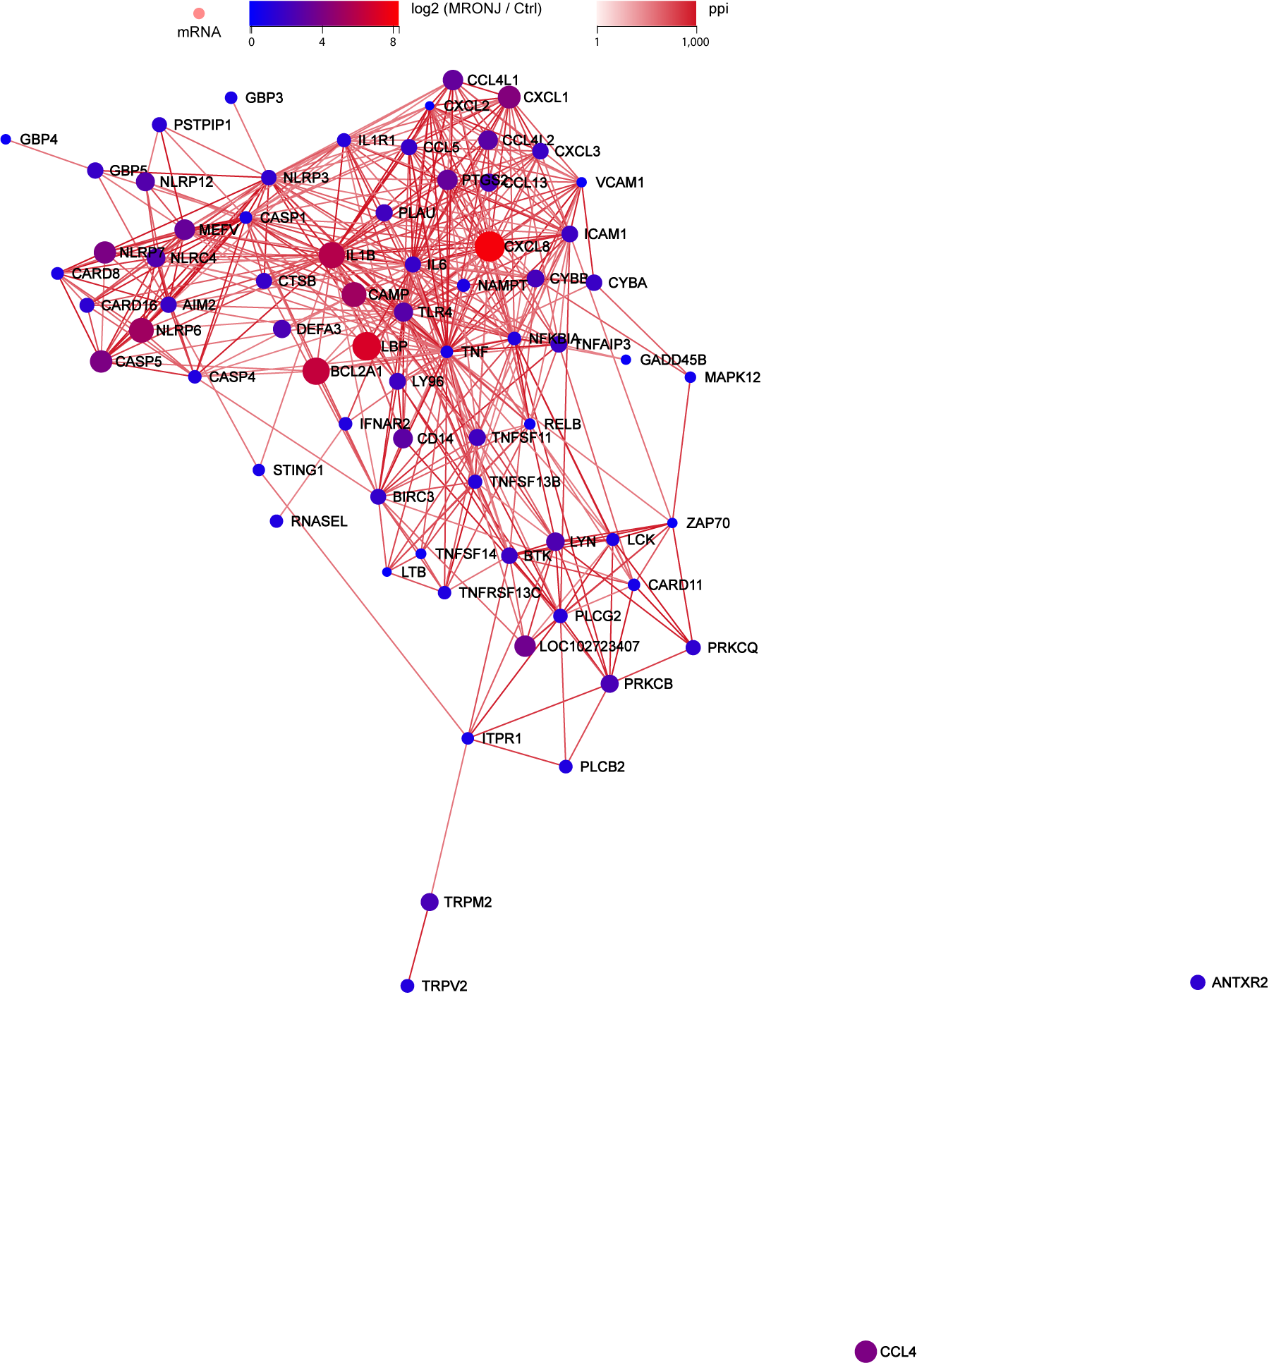


**Figure S2.** PPI network complex of the interaction of specific DEGs in the NOD/ NF-κB signaling pathway.


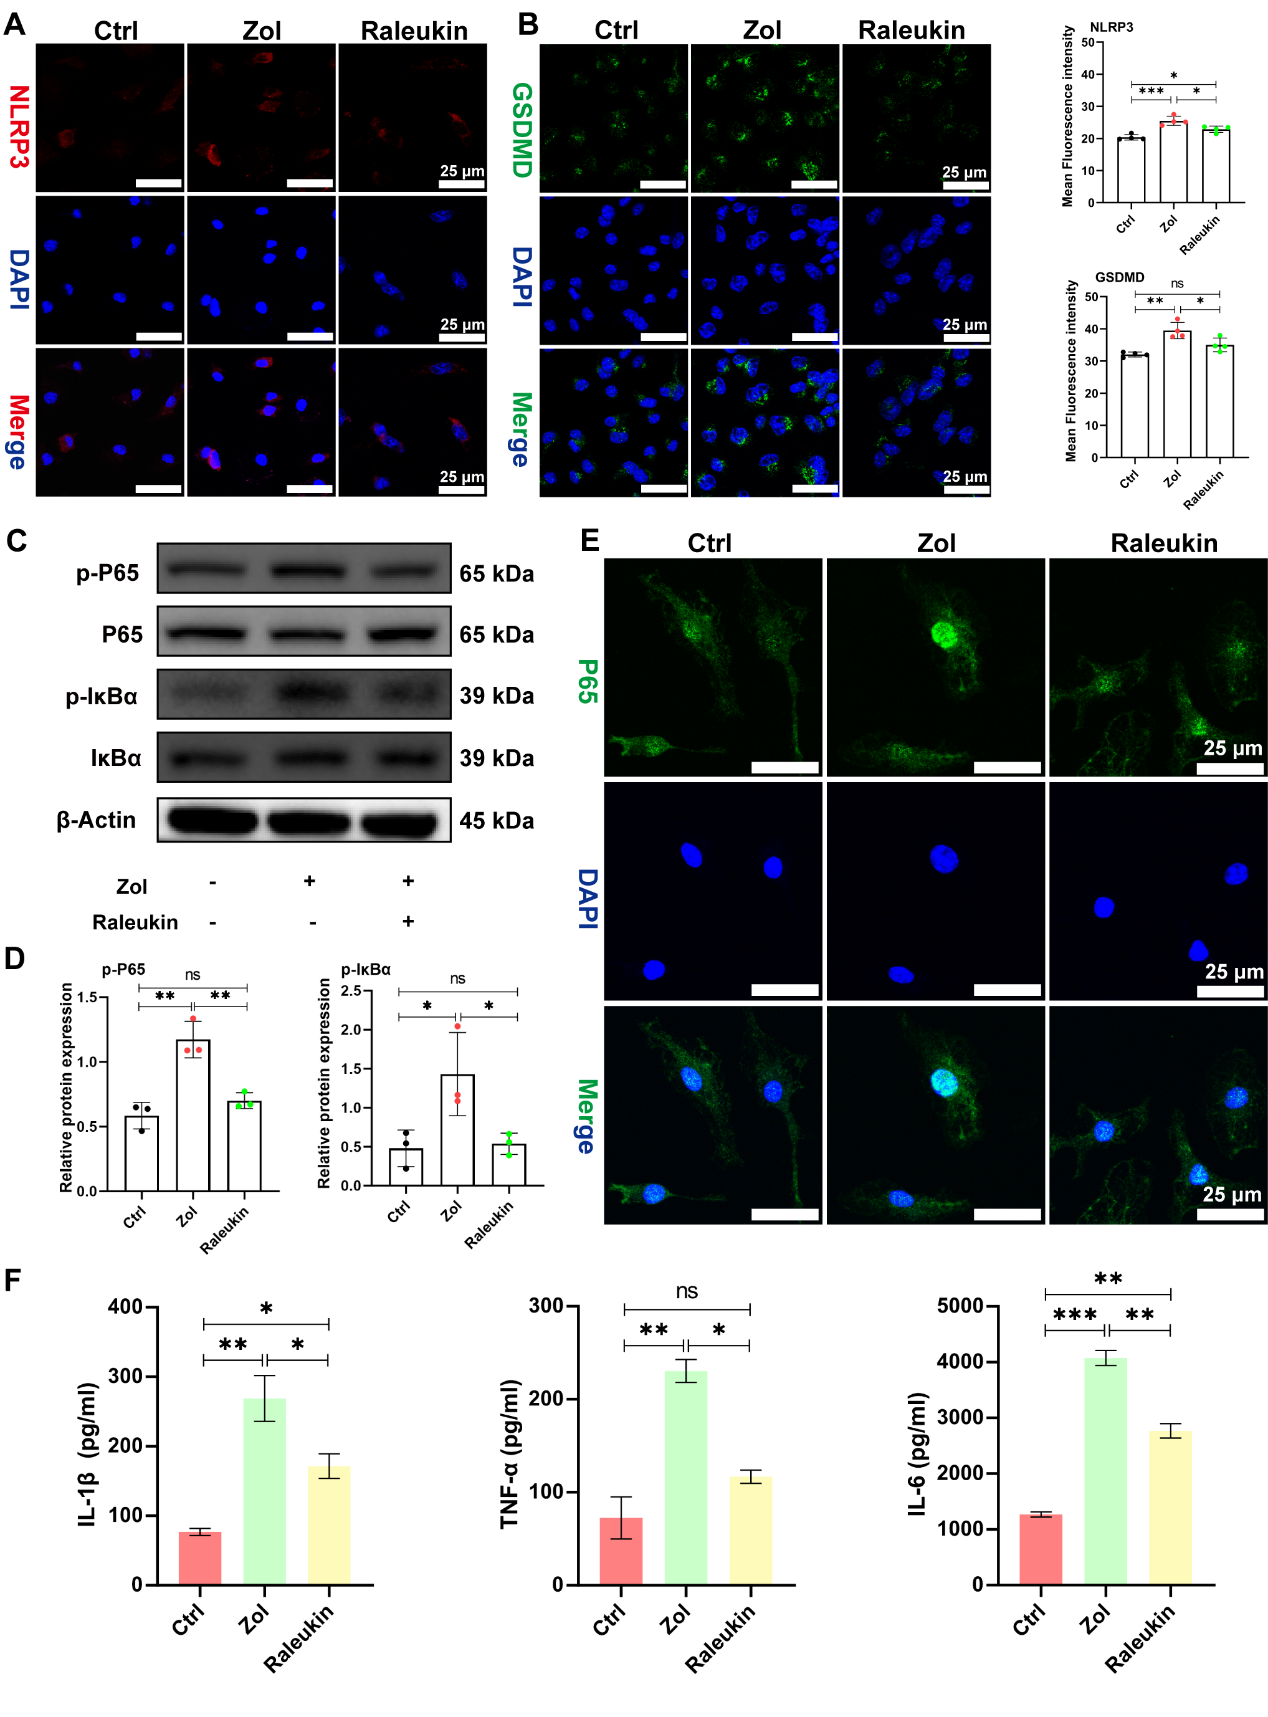


**Figure S3. Raleukin inhibits pyroptosis by NF-κB signaling pathway *in vitro*. (A)** IF staining for NLRP3 in BMDMs. Scale bar = 25 μm. **(B)** IF staining for GSDMD in BMDMs. Scale bar = 25 μm. **(C-D)** P65, p-P65, IκBα, and p-IκBα levels by western blot in BMDMs. **(E)** IF staining for P65 in BMDMs. Scale bar = 25 μm. **(F)** IL-1β, TNF-α, and IL-6 levels by ELISA.Data in this figure, mean ± SD, *p<0.05, **p<0.01, ***p<0.001.
